# Supplementary material
Source: PubMed Central journal article supplement (PMC4112736)
Supplement: NIHMS512095-supplement-Supp_Fig_S1.pdf [file NIHMS512095-supplement-Supp_Fig_S1.pdf]

# Supplementary Figure 1.

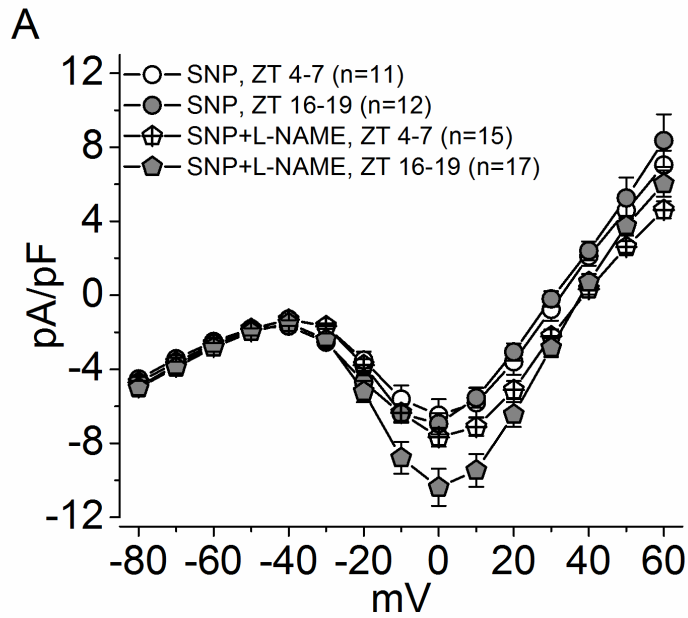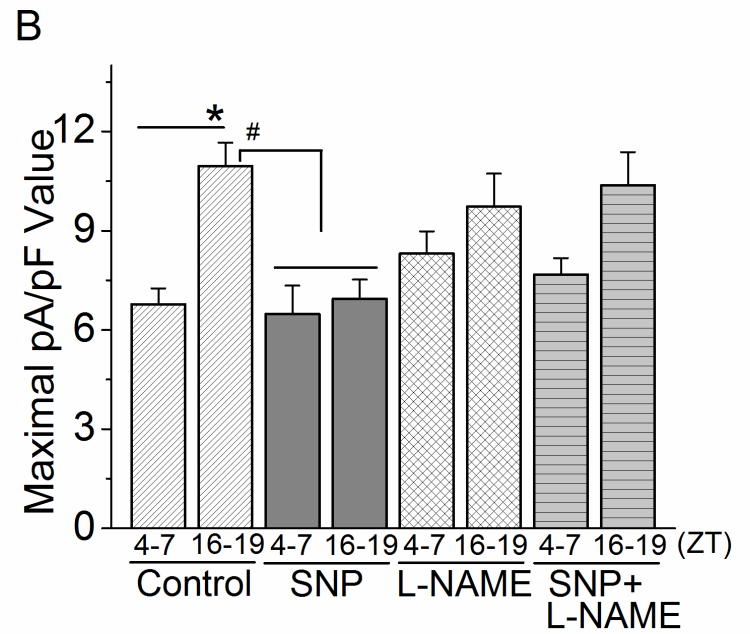

Photoreceptors treated with SNP (100 $\mu$ M) at night had a significant decrease (#) of L-VGCC currents compared to the control recorded at night (ZT 16-19), similar to the SNAP results (Fig. 2E, 2H). Treatment with L-NAME (100  $\mu$ M) slightly increased L-VGCCs when cells were recorded during the day, and marginally decreased L-VGCCs when cells were recorded at night (as shown in Fig. 3D). Cells treated with SNP+L-NAME (recorded during the day and night) were not statistically different from the controls (both day and night). \* indicates that there is a significant difference between control cells recorded during the day (ZT 4-7) and night (ZT 16-19).
